# Supplementary material for: Body size and life history shape the historical biogeography of tetrapods
Source: PubMed Central journal article supplement (PMC10482685; doi:10.1038/s41559-023-02150-5), 2023-08-21
Supplement: 41559_2023_2150_MOESM2_ESM.pdf [file 41559_2023_2150_MOESM2_ESM.pdf]

## Reporting Summary

Nature Portfolio wishes to improve the reproducibility of the work that we publish. This form provides structure for consistency and transparency in reporting. For further information on Nature Portfolio policies, see our [Editorial Policies](#) and the [Editorial Policy Checklist](#).

### Statistics

For all statistical analyses, confirm that the following items are present in the figure legend, table legend, main text, or Methods section.

n/a Confirmed

- The exact sample size ( $n$ ) for each experimental group/condition, given as a discrete number and unit of measurement
- A statement on whether measurements were taken from distinct samples or whether the same sample was measured repeatedly
- The statistical test(s) used AND whether they are one- or two-sided  
*Only common tests should be described solely by name; describe more complex techniques in the Methods section.*
- A description of all covariates tested
- A description of any assumptions or corrections, such as tests of normality and adjustment for multiple comparisons
- A full description of the statistical parameters including central tendency (e.g. means) or other basic estimates (e.g. regression coefficient) AND variation (e.g. standard deviation) or associated estimates of uncertainty (e.g. confidence intervals)
- For null hypothesis testing, the test statistic (e.g.  $F$ ,  $t$ ,  $r$ ) with confidence intervals, effect sizes, degrees of freedom and  $P$  value noted  
*Give  $P$  values as exact values whenever suitable.*
- For Bayesian analysis, information on the choice of priors and Markov chain Monte Carlo settings
- For hierarchical and complex designs, identification of the appropriate level for tests and full reporting of outcomes
- Estimates of effect sizes (e.g. Cohen's  $d$ , Pearson's  $r$ ), indicating how they were calculated

*Our web collection on [statistics for biologists](#) contains articles on many of the points above.*

### Software and code

Policy information about [availability of computer code](#)

Data collection

Data analysis

For manuscripts utilizing custom algorithms or software that are central to the research but not yet described in published literature, software must be made available to editors and reviewers. We strongly encourage code deposition in a community repository (e.g. GitHub). See the Nature Portfolio [guidelines for submitting code & software](#) for further information.

### Data

Policy information about [availability of data](#)

All manuscripts must include a [data availability statement](#). This statement should provide the following information, where applicable:

- Accession codes, unique identifiers, or web links for publicly available datasets
- A description of any restrictions on data availability
- For clinical datasets or third party data, please ensure that the statement adheres to our [policy](#)

and differences in trait dispersal patterns are archived on Figshare at <https://doi.org/10.6084/m9.figshare.21897003>. Further data and for preliminary and intermediate analyses will be made available by the authors upon reasonable request.

## Human research participants

Policy information about [studies involving human research participants and Sex and Gender in Research](#).

|                             |     |
|-----------------------------|-----|
| Reporting on sex and gender | N/A |
| Population characteristics  | N/A |
| Recruitment                 | N/A |
| Ethics oversight            | N/A |

Note that full information on the approval of the study protocol must also be provided in the manuscript.

## Field-specific reporting

Please select the one below that is the best fit for your research. If you are not sure, read the appropriate sections before making your selection.

Life sciences       Behavioural & social sciences       Ecological, evolutionary & environmental sciences

For a reference copy of the document with all sections, see [nature.com/documents/nr-reporting-summary-flat.pdf](https://nature.com/documents/nr-reporting-summary-flat.pdf)

## Ecological, evolutionary & environmental sciences study design

All studies must disclose on these points even when the disclosure is negative.

|                          |                                                                                                                                                                                                                                                                                                                                                                                                                                                                                                                                                                                           |
|--------------------------|-------------------------------------------------------------------------------------------------------------------------------------------------------------------------------------------------------------------------------------------------------------------------------------------------------------------------------------------------------------------------------------------------------------------------------------------------------------------------------------------------------------------------------------------------------------------------------------------|
| Study description        | We compiled phylogenetic, trait and species distribution data for 56 clades of tetrapods (spread across 10 amphibian clades, 15 mammal clades, 17 reptile clades, and 14 bird clades). We used trait-dependent and trait-independent biogeographic models to investigate the effect of traits in clades' biogeographic histories. We further analysed differences in the magnitude of trait effects and trait-dispersal patterns between clades.                                                                                                                                          |
| Research sample          | We compiled species-level trait data, species distribution data and phylogenetic data for 56 clades of tetrapods (7009 species spread across 10 amphibian clades, 15 mammal clades, 17 reptile clades, and 14 bird clades). These clades were chosen based on data availability. Trait data contained body size and life history traits. Species distribution data contained polygons of ranges and point data. Phylogenetic data was compiled in form of dated phylogenetic trees. Data sources are listed in the methods section of the main manuscript and in the extended data files. |
| Sampling strategy        | N/A                                                                                                                                                                                                                                                                                                                                                                                                                                                                                                                                                                                       |
| Data collection          | Data were collected from publicly available sources by the first author with help from the third author.                                                                                                                                                                                                                                                                                                                                                                                                                                                                                  |
| Timing and spatial scale | Data were compiled from publicly available sources between 04/2020 and 04/2021.                                                                                                                                                                                                                                                                                                                                                                                                                                                                                                           |
| Data exclusions          | No data were excluded.                                                                                                                                                                                                                                                                                                                                                                                                                                                                                                                                                                    |
| Reproducibility          | We have provided data and code to repeat our analyses.                                                                                                                                                                                                                                                                                                                                                                                                                                                                                                                                    |
| Randomization            | Randomization was not applicable since our study is not experimental.                                                                                                                                                                                                                                                                                                                                                                                                                                                                                                                     |
| Blinding                 | Blinding was not applicable since our study is not experimental.                                                                                                                                                                                                                                                                                                                                                                                                                                                                                                                          |

Did the study involve field work?     Yes     No

## Reporting for specific materials, systems and methods

We require information from authors about some types of materials, experimental systems and methods used in many studies. Here, indicate whether each material, system or method listed is relevant to your study. If you are not sure if a list item applies to your research, read the appropriate section before selecting a response.

## Materials & experimental systems

- | n/a                                 | Involvement in the study                               |
|-------------------------------------|--------------------------------------------------------|
| <input checked="" type="checkbox"/> | <input type="checkbox"/> Antibodies                    |
| <input checked="" type="checkbox"/> | <input type="checkbox"/> Eukaryotic cell lines         |
| <input checked="" type="checkbox"/> | <input type="checkbox"/> Palaeontology and archaeology |
| <input checked="" type="checkbox"/> | <input type="checkbox"/> Animals and other organisms   |
| <input checked="" type="checkbox"/> | <input type="checkbox"/> Clinical data                 |
| <input checked="" type="checkbox"/> | <input type="checkbox"/> Dual use research of concern  |

## Methods

- | n/a                                 | Involvement in the study                        |
|-------------------------------------|-------------------------------------------------|
| <input checked="" type="checkbox"/> | <input type="checkbox"/> ChIP-seq               |
| <input checked="" type="checkbox"/> | <input type="checkbox"/> Flow cytometry         |
| <input checked="" type="checkbox"/> | <input type="checkbox"/> MRI-based neuroimaging |
